# Supplementary material
Source: publisher site journal article supplement (https://www.dovepress.com/article/378045)
Supplement: Supplementary file 1 [file get_supplementary_file.php]

| **Appendix 1: Interview Script**  **Questions**   - How did you come to work with the team? - When you first talked with the team about joining, did management understand what a DO is? Did you have to explain? - Are there clinical advantages or disadvantages to being a DO working with professional sports teams? - Do you use OMM in your work with the team? - Do players know what makes DOs different? Do they care whether they see MDs or DOs? Do players have questions? - How would you characterize your identity as an osteopathic physician? Is being a DO important to you? - In what other ways is being an osteopathic physician relevant to your work in sports medicine? |
| --- |
